# Supplementary material for: Plant nitrogen uptake drives responses of productivity to nitrogen and water addition in a grassland
Source: PubMed Central journal article supplement — Sci Rep. 2014 Apr 28;4:4817. doi: 10.1038/srep04817 (PMC4001094; doi:10.1038/srep04817), 2014-04-28

Supplementary materials

**Title:** Plant N uptake drives responses of productivity to nitrogen and water addition in a grassland

**Authors:** Xiao-Tao Lü, Feike A. Dijkstra, De-Liang Kong, Zheng-Wen Wang, Xing-Guo Han

**Figure S1**

Monthly precipitation and temperature in 2007 and 2008, and their long-term mean in the study area

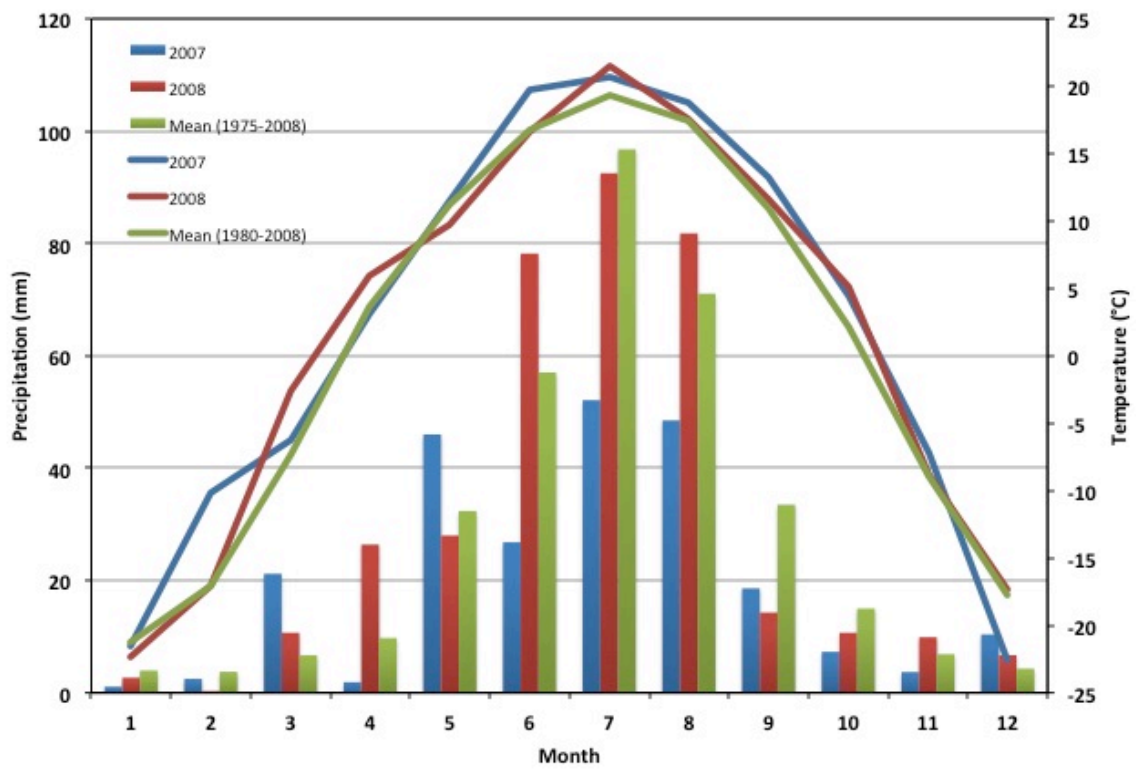

Supplement: srep04817-s1.pdf [file srep04817-s1.pdf]
